# Supplementary material for: Synthesis and characterization of a strong ferromagnetic and high hardness intermetallic compound Fe2B
Source: Royal Society of Chemistry journal article supplement (doi:10.1039/d0cp03380d), 2020-01-01
Supplement: d0cp03380d1.pdf [file d0cp03380d1.pdf]

## Supporting Information

### **Synthesis and characterization of the strong ferromagnetic and high hardness intermetallic compound Fe<sub>2</sub>B**

Xingbin Zhao<sup>1</sup>, Kuo Bao<sup>1\*</sup>, Pinwen Zhu<sup>1</sup>, Li Li<sup>1</sup>, Qiang Tao<sup>1</sup>, Shuailing Ma<sup>1</sup>, Bo Liu<sup>1</sup>, Yufei Ge<sup>1</sup>, Da Li<sup>1</sup>,  
Tian Cui<sup>2,1</sup>

1. State Key Laboratory of Superhard Materials, College of Physics, Jilin University, Changchun, 130012, People's Republic of China.
2. School of Physical Scientific and Technology, Ningbo University, Ningbo, 315211, PR China.

\* E-mail: baokuo@jlu.edu.cn. Tel./ Fax: +86-431-85168825.

\* E-mail: cuitian@jlu.edu.cn. Tel./ Fax: +86-431-85168825.

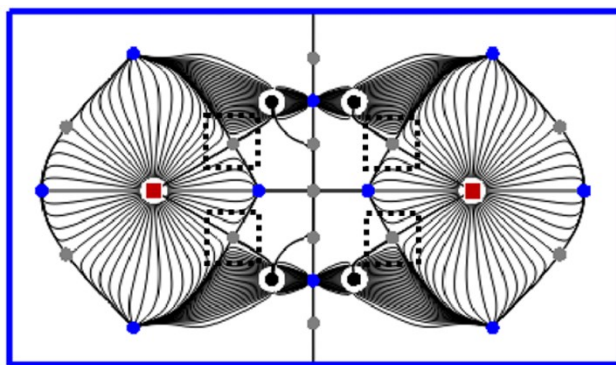

**Fig S1.** Gradient paths and critical points derived from AIM analysis for Fe<sub>2</sub>B, Gray spheres represent BCPs, black spheres represent B, and red squares represent Fe. Gray spheres in dashed line boxes represent BCPs between Fe and B.

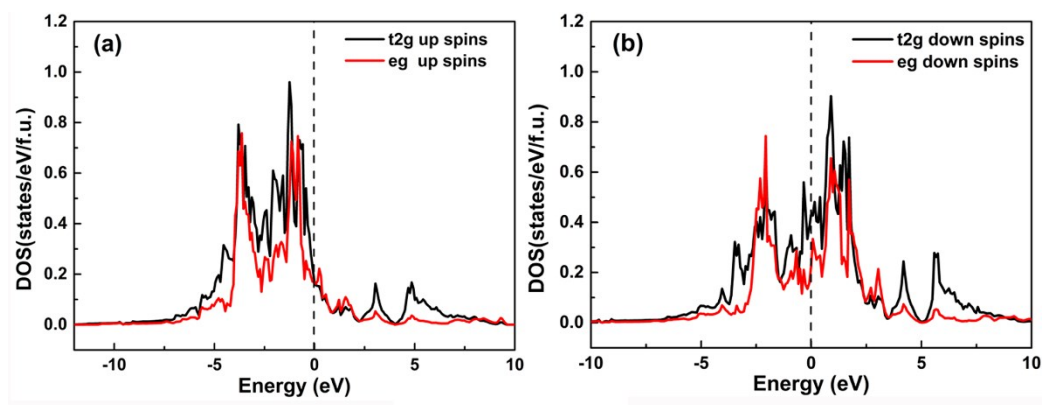

**Fig S2.** The calculated DOS with spin-polarization for up spins (a) and down spins (b) in  $e_g$  and  $t_{2g}$  orbitals
